# Supplementary material for: Photochromism and photocatalysis of organic–inorganic hybrid iodoargentates modulated by argentophilic interactions
Source: Royal Society of Chemistry journal article supplement (doi:10.1039/d0qi00744g), 2020-01-01
Supplement: d0qi00744g1.pdf [file d0qi00744g1.pdf]

## Supporting Information (SI)

# Photochromism and photocatalysis of organic-inorganic hybrid iodoargentates modulated by argentophilic interactions

Pengfei Hao,\* Yi Xu, Xia Li, Junju Shen and Yunlong Fu\*

*Key Laboratory of Magnetic Molecules, Magnetic Information Materials Ministry of Education, School of Chemical and Material Science, Shanxi Normal University, Linfen 041004, China*

*\*Corresponding author. Tel: 0357/2053716; Fax: (+86) 357 2053716.*

*E-mail address: haopengfei\_2015@126.com; yunlongfu@sxnu.edu.cn.*

### Content

|                                                                                                                                                             |   |
|-------------------------------------------------------------------------------------------------------------------------------------------------------------|---|
| <b>1. Chemical analytical experiment for photoproducts</b> .....                                                                                            | 3 |
| <b>2. Figures</b> .....                                                                                                                                     | 4 |
| <b>Fig. S1.</b> IR spectra of <b>1-4</b> . .....                                                                                                            | 4 |
| <b>Fig. S2.</b> The asymmetric unit diagram of <b>1</b> . .....                                                                                             | 4 |
| <b>Fig. S3.</b> The asymmetric unit diagram of <b>2</b> . .....                                                                                             | 4 |
| <b>Fig. S4.</b> The asymmetric unit diagram of <b>3</b> . .....                                                                                             | 5 |
| <b>Fig. S5.</b> The asymmetric unit diagram of <b>4</b> . .....                                                                                             | 5 |
| <b>Fig. S6.</b> Thermo-gravimetric (TG) and differential scanning calorimetry (DSC) curves of <b>1</b> .....                                                | 5 |
| <b>Fig. S7.</b> Thermo-gravimetric (TG) and differential scanning calorimetry (DSC) curves of <b>2</b> .....                                                | 6 |
| <b>Fig. S8.</b> Thermo-gravimetric (TG) and differential scanning calorimetry (DSC) curves of <b>3</b> .....                                                | 6 |
| <b>Fig. S9.</b> Thermo-gravimetric (TG) and differential scanning calorimetry (DSC) curves of <b>4</b> .....                                                | 6 |
| <b>Fig. S10.</b> The UV-vis absorption spectra (a) and band gaps (b) for <b>1, 2, 3</b> and <b>4</b> . .....                                                | 7 |
| <b>Fig. S11.</b> UV-vis absorption spectra of <b>1</b> before and after UV light irradiation. The inset showing the photochromic behavior of <b>1</b> ..... | 7 |
| <b>Fig. S12.</b> UV-vis absorption spectra of <b>2</b> before and after UV light irradiation. The inset                                                     |   |

|                                                                                                                            |    |
|----------------------------------------------------------------------------------------------------------------------------|----|
| showing the photochromic behavior of <b>2</b> .....                                                                        | 7  |
| <b>Fig. S13.</b> Powder X-ray diffraction (PXRD) patterns of <b>1</b> and <b>1P</b> at room temperature.....               | 8  |
| <b>Fig. S14.</b> Powder X-ray diffraction (PXRD) patterns of <b>2</b> and <b>2P</b> at room temperature.....               | 8  |
| <b>Fig. S15.</b> The EPR spectra of <b>3</b> and <b>3P</b> (a), and <b>4</b> and <b>4P</b> (b) .....                       | 8  |
| <b>Fig. S16.</b> The surface enhanced raman spectra (SERS) of <b>4</b> upon UV light irradiation. ....                     | 9  |
| <b>Fig. S17.</b> UV-vis absorption spectra of <b>3</b> and <b>3P</b> -heating at 160°C for 3 h.....                        | 9  |
| <b>Fig. S18.</b> UV-vis absorption spectra of <b>4</b> and <b>4P</b> -heating at 160°C for 5 h.....                        | 9  |
| <b>Fig. S19.</b> The coloration-decoloration processes with repeated UV irradiation/heating of <b>3</b> .<br>.....         | 10 |
| <b>Fig. S20.</b> The coloration-decoloration processes with repeated UV irradiation/heating of <b>3</b> .<br>.....         | 10 |
| <b>Fig. S21.</b> UV-vis absorption spectra of the RhB solution in the presence of <b>3</b> upon light<br>irradiation. .... | 10 |
| <b>Fig. S22.</b> UV-vis absorption spectra of the RhB solution in the presence of <b>4</b> upon light<br>irradiation. .... | 11 |
| <b>Fig. S23.</b> The PXRD patterns of <b>3</b> before and after photodegradation. ....                                     | 11 |
| <b>Fig. S24.</b> The PXRD patterns of <b>4</b> before and after photodegradation. ....                                     | 11 |
| <b>3. Tables</b> .....                                                                                                     | 12 |
| <b>Table S1</b> Crystal data and structure refinement for compounds <b>1-4</b> . ....                                      | 12 |
| <b>Table S2</b> Selected bond lengths (Å) and angles (°) for <b>1-4</b> .....                                              | 13 |
| <b>Table S3.</b> Hydrogen bonds of for compounds <b>1-4</b> (Å and °). ....                                                | 15 |
| <b>Table S4.</b> Synthesis conditions for compounds <b>1-4</b> . ....                                                      | 17 |

### **1. Chemical analytical experiment for photoproducts**

Dissolve 0.20 mmol powder samples of **3**, **3P**, **4** and **4P** in 5 ml dimethyl sulfoxide containing 1 mmol and 1 mmol NaI and Na<sub>2</sub>S<sub>2</sub>O<sub>3</sub>, respectively. After several minutes, a small number of black precipitated particles are obtained in the solution of **3P** and **4P**. And then black precipitated particles are washed, dried and treated with concentrated HNO<sub>3</sub>, solution of NaCl and concentrated NH<sub>3</sub>·H<sub>2</sub>O in turn, exhibiting the generation of metal silver particles. The above processes are implemented in the dark at room temperature.

## 2. Figures

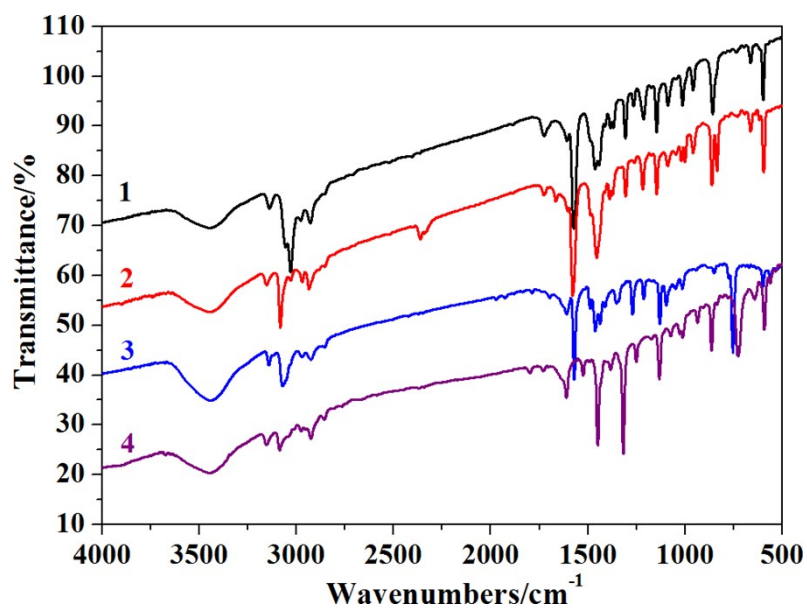

Fig. S1. IR spectra of 1-4.

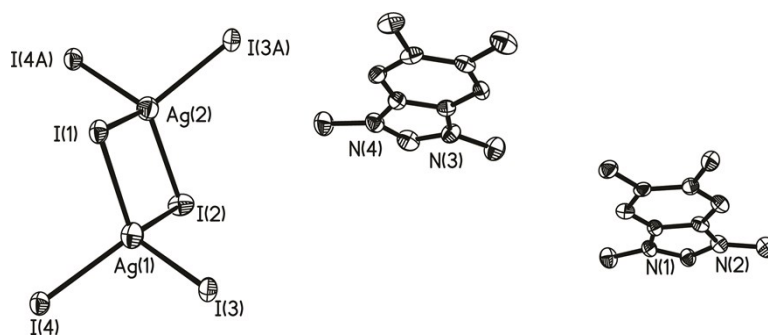

Fig. S2. The asymmetric unit diagram of 1.

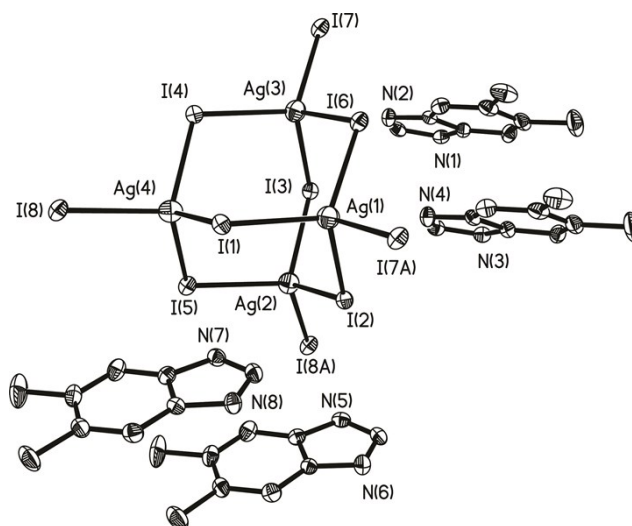

Fig. S3. The asymmetric unit diagram of 2.

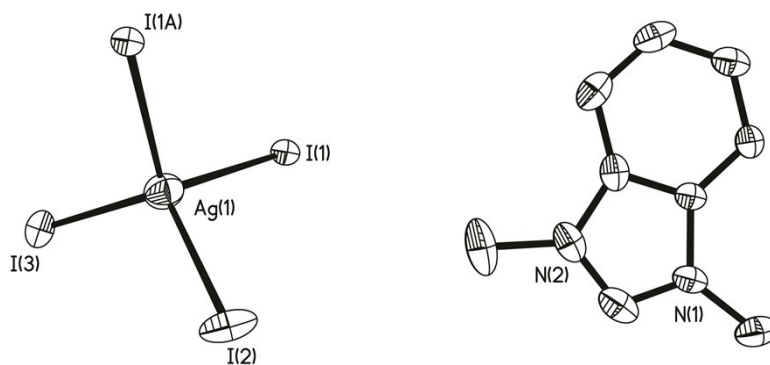

Fig. S4. The asymmetric unit diagram of 3.

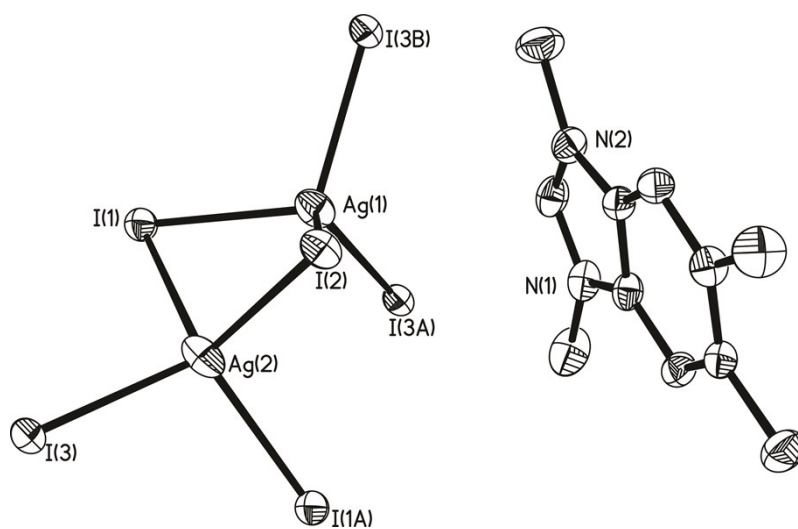

Fig. S5. The asymmetric unit diagram of 4.

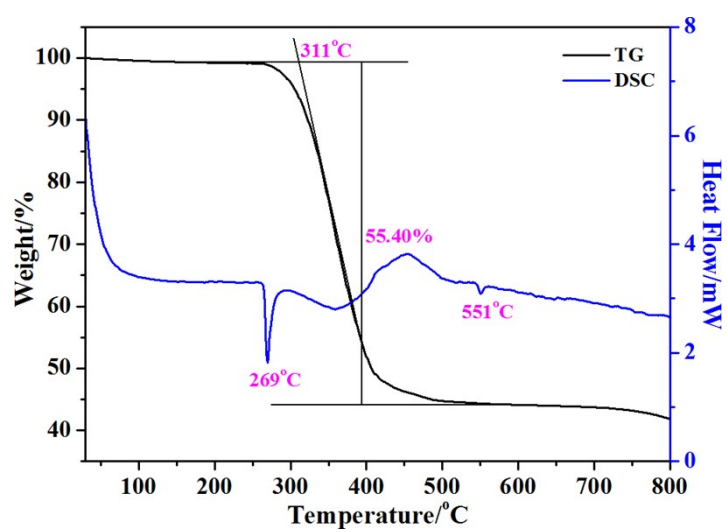

Fig. S6. Thermo-gravimetric (TG) and differential scanning calorimetry (DSC) curves of 1.

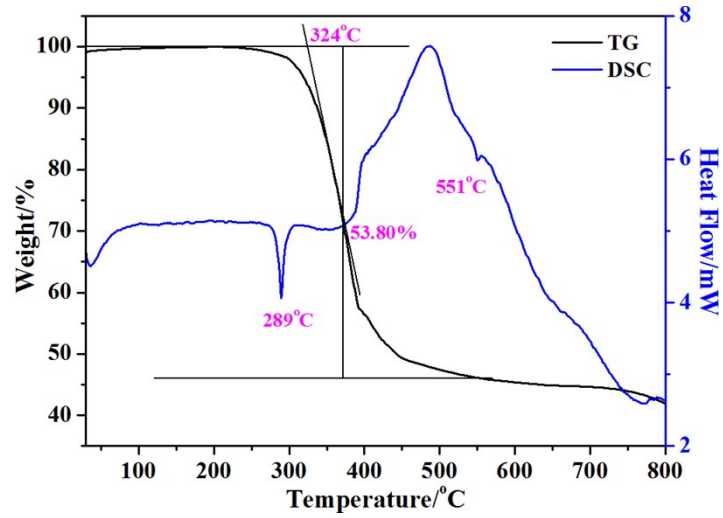

Fig. S7. Thermo-gravimetric (TG) and differential scanning calorimetry (DSC) curves of **2**.

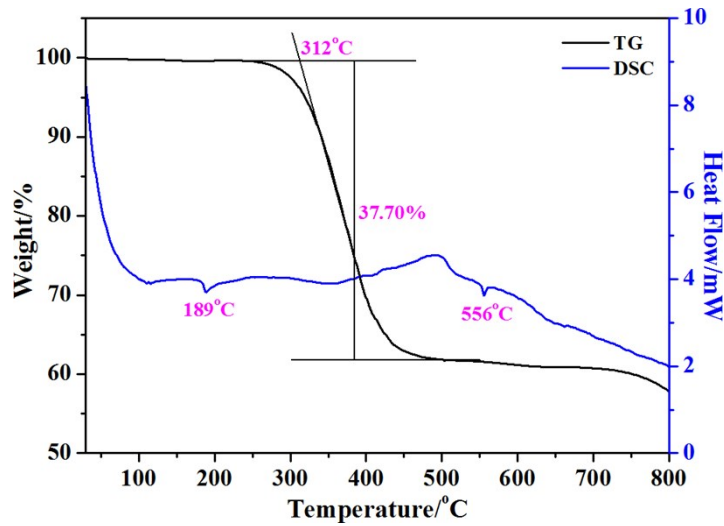

Fig. S8. Thermo-gravimetric (TG) and differential scanning calorimetry (DSC) curves of **3**.

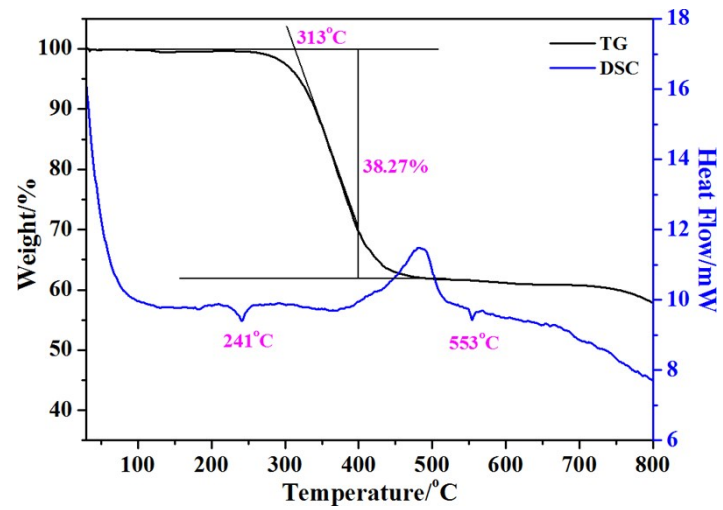

Fig. S9. Thermo-gravimetric (TG) and differential scanning calorimetry (DSC) curves of **4**.

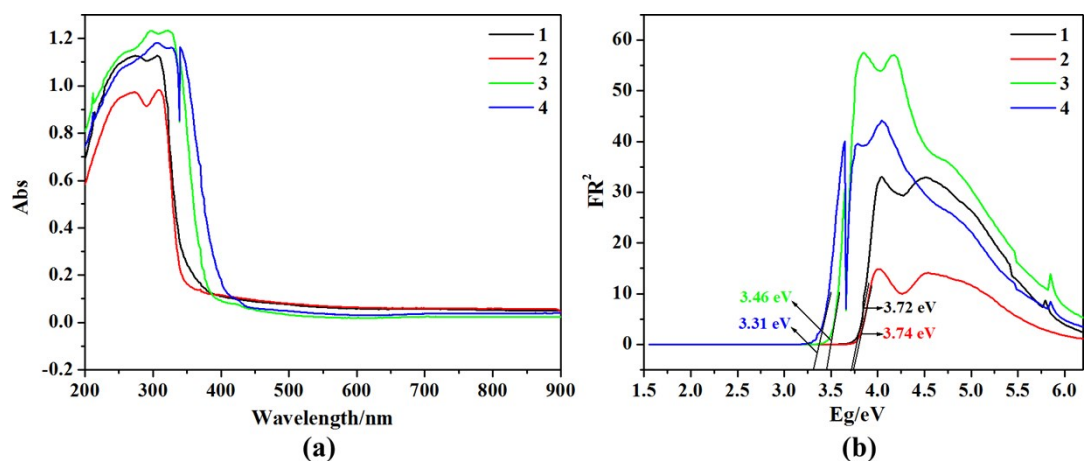

**Fig. S10.** The UV-vis absorption spectra (a) and band gaps (b) for **1**, **2**, **3** and **4**.

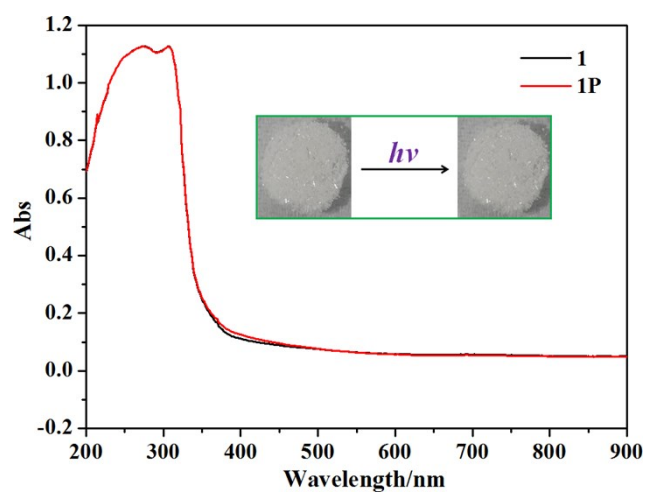

**Fig. S11.** UV-vis absorption spectra of **1** before and after UV light irradiation. The inset showing the photochromic behavior of **1**.

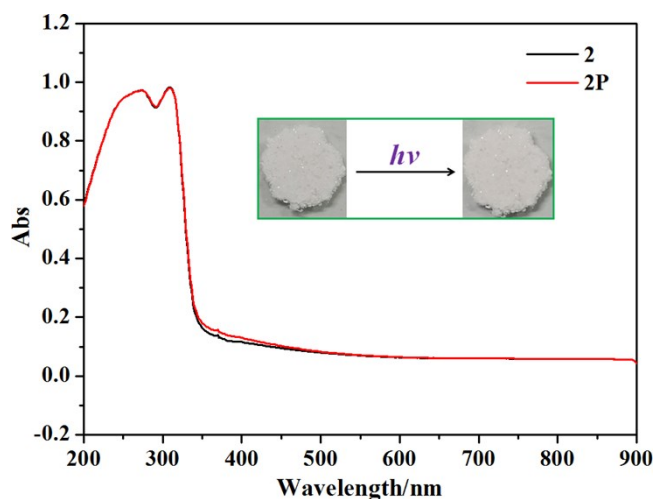

**Fig. S12.** UV-vis absorption spectra of **2** before and after UV light irradiation. The inset showing the photochromic behavior of **2**.

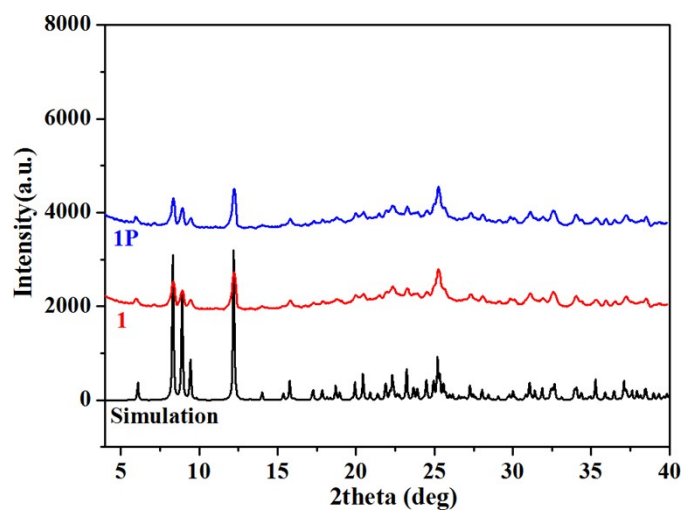

**Fig. S13.** Powder X-ray diffraction (PXRD) patterns of **1** and **1P** at room temperature.

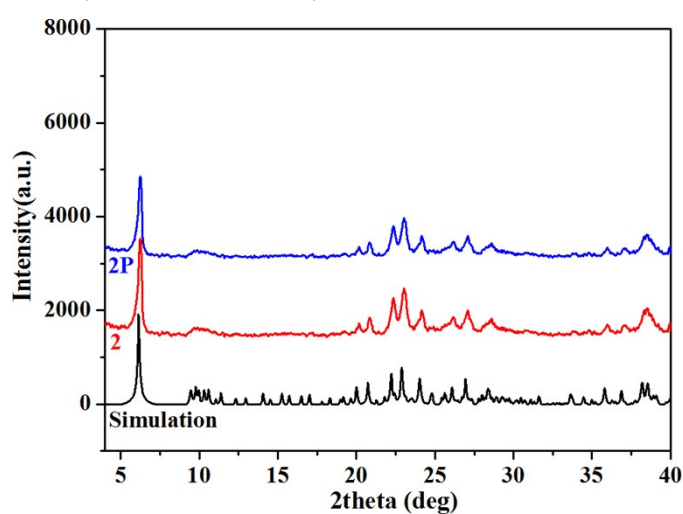

**Fig. S14.** Powder X-ray diffraction (PXRD) patterns of **2** and **2P** at room temperature.

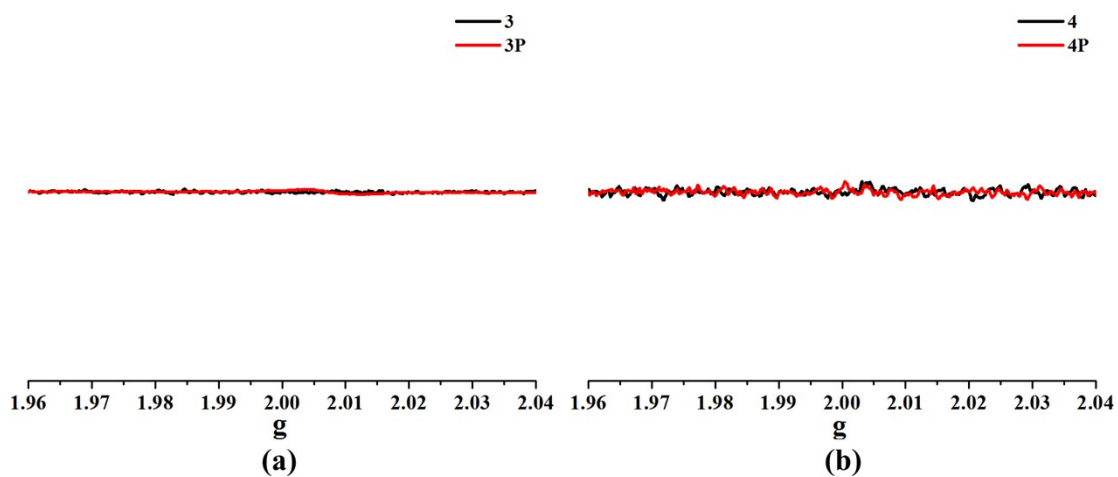

**Fig. S15.** The EPR spectra of **3** and **3P** (a), and **4** and **4P** (b)



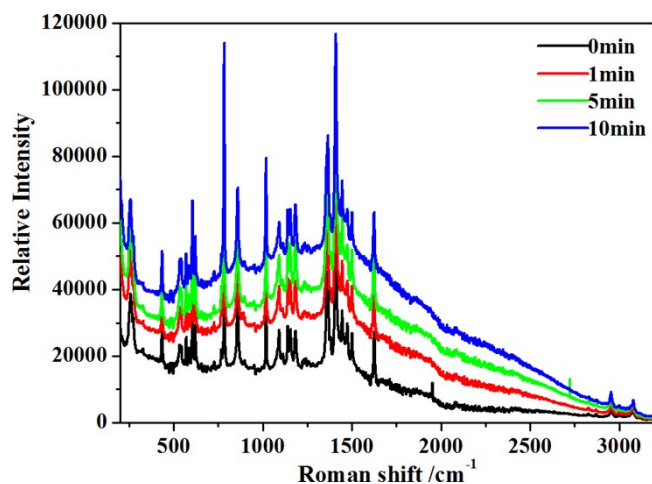

Fig. S16. The surface enhanced raman spectra (SERS) of **4** upon UV light irradiation.

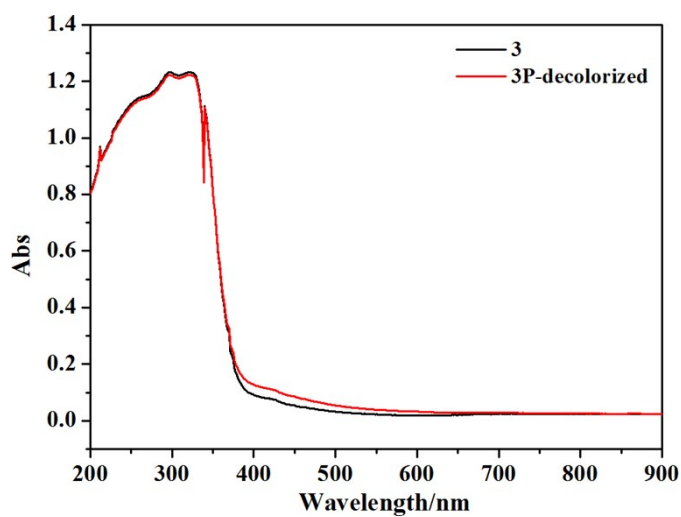

Fig. S17. UV-vis absorption spectra of **3** and **3P-decolorized**.

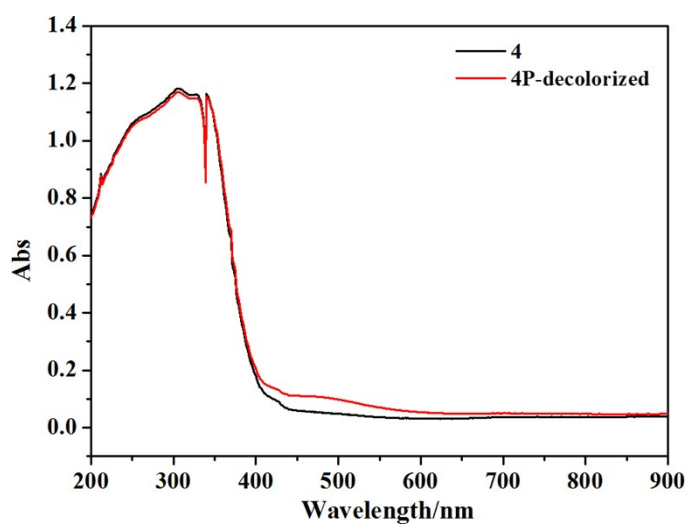

Fig. S18. UV-vis absorption spectra of **4** and **4P-decolorized**.

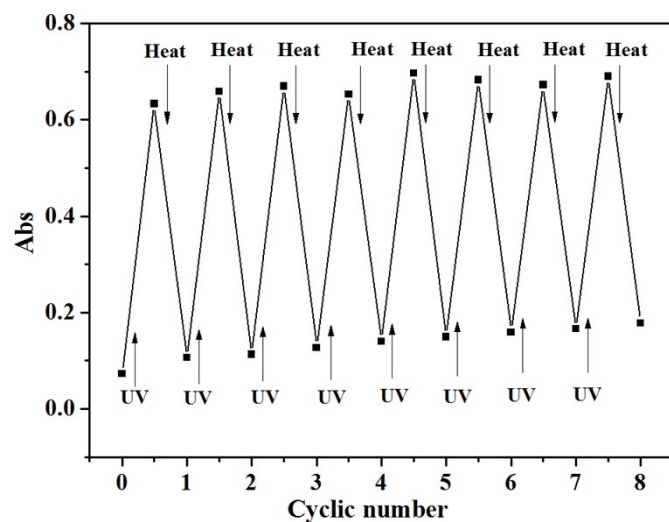

Fig. S19. The coloration-decoloration processes with repeated UV irradiation/heating of **3**.

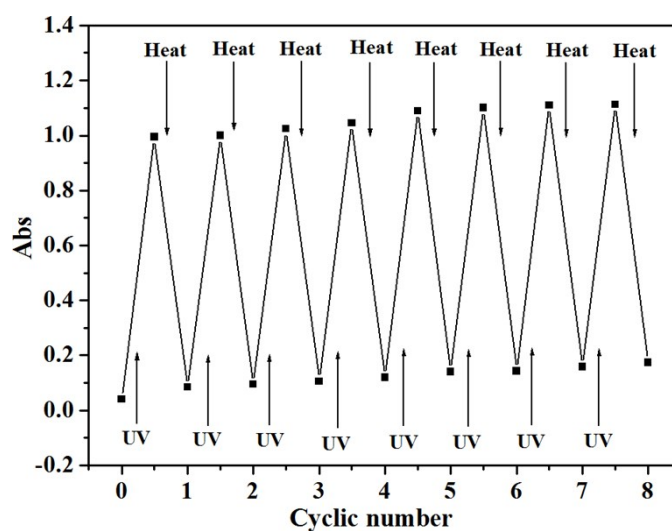

Fig. S20. The coloration-decoloration processes with repeated UV irradiation/heating of **3**.

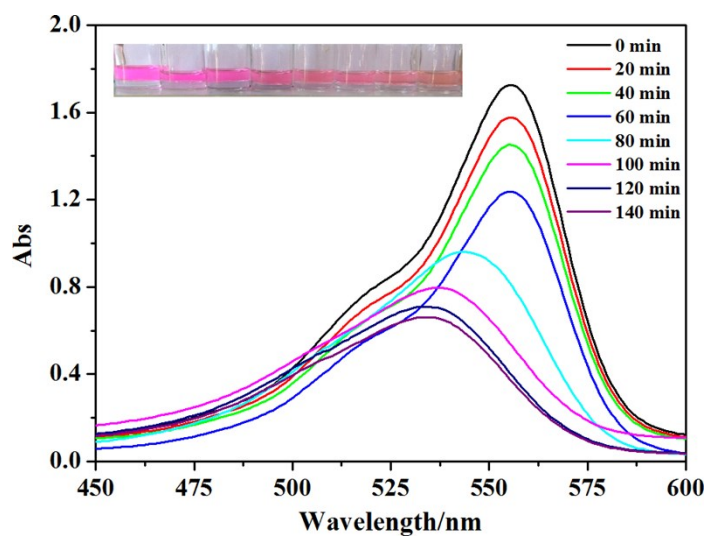

Fig. S21. UV-vis absorption spectra of the RhB solution in the presence of **3** upon light irradiation.

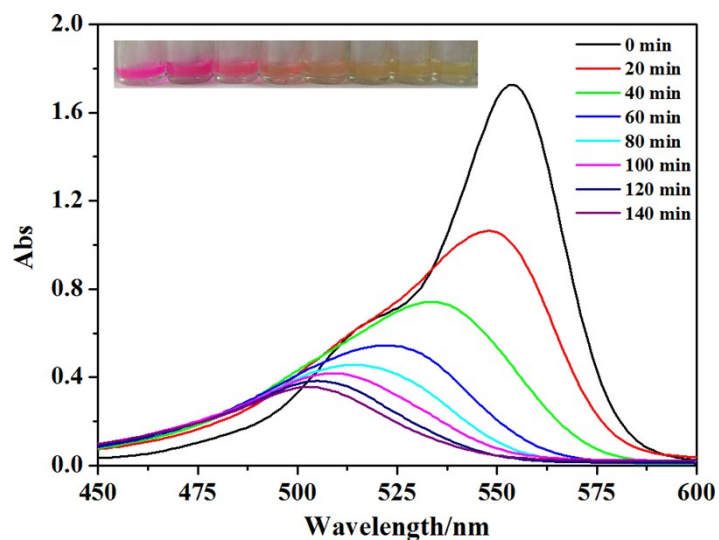

Fig. S22. UV-vis absorption spectra of the RhB solution in the presence of **4** upon light irradiation.

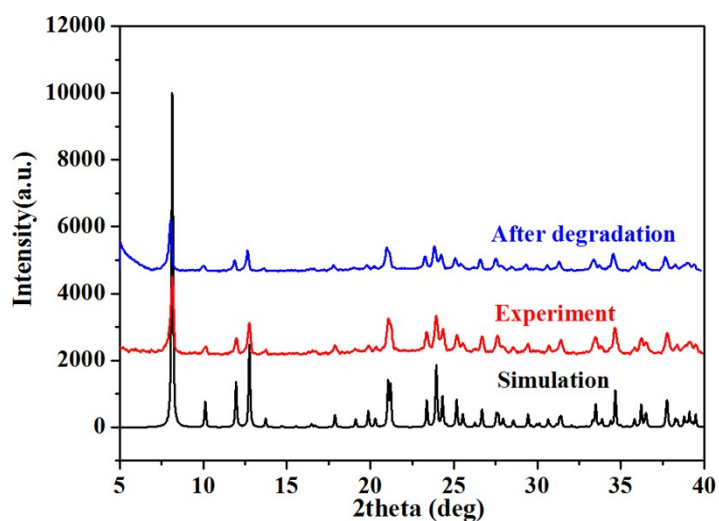

Fig. S23. The PXRD patterns of **3** before and after photodegradation.

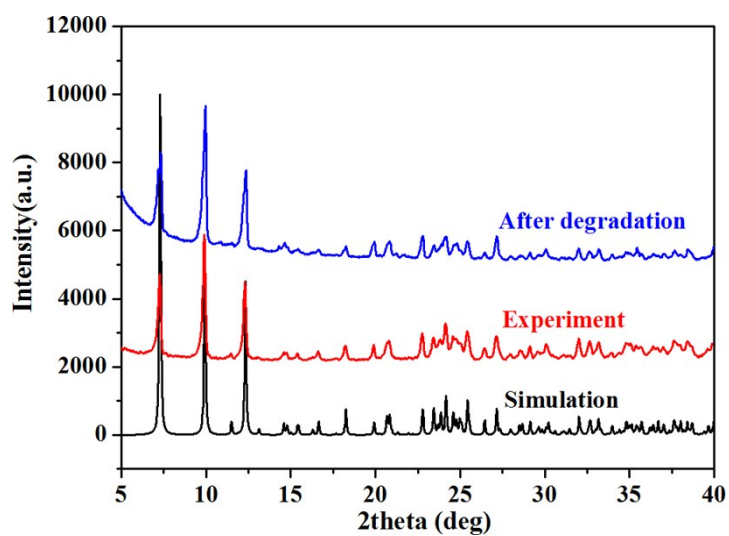

Fig. S24. The PXRD patterns of **4** before and after photodegradation.

### 3. Tables

**Table S1** Crystal data and structure refinement for compounds **1-4**.

| Compounds                                                                                   | <b>1</b>                                                                      | <b>2</b>                                                                      | <b>3</b>                                                                     | <b>4</b>                                                                      |
|---------------------------------------------------------------------------------------------|-------------------------------------------------------------------------------|-------------------------------------------------------------------------------|------------------------------------------------------------------------------|-------------------------------------------------------------------------------|
| CCDC code                                                                                   | 2003491                                                                       | 2003492                                                                       | 2003493                                                                      | 2003494                                                                       |
| Empirical formula                                                                           | C <sub>22</sub> H <sub>30</sub> N <sub>4</sub> Ag <sub>2</sub> I <sub>4</sub> | C <sub>36</sub> H <sub>44</sub> N <sub>8</sub> Ag <sub>4</sub> I <sub>8</sub> | C <sub>9</sub> H <sub>11</sub> N <sub>2</sub> Ag <sub>2</sub> I <sub>3</sub> | C <sub>11</sub> H <sub>15</sub> N <sub>2</sub> Ag <sub>2</sub> I <sub>3</sub> |
| Formula weight                                                                              | 1073.84                                                                       | 2035.47                                                                       | 743.64                                                                       | 771.69                                                                        |
| Crystal size (mm)                                                                           | 0.05×0.05×0.4                                                                 | 0.35×0.22×0.0                                                                 | 0.07×0.03×0.0                                                                | 0.29×0.12×0.1                                                                 |
| Crystal system                                                                              | Monoclinic                                                                    | Triclinic                                                                     | Orthorhombic                                                                 | Monoclinic                                                                    |
| Space group                                                                                 | <i>P2<sub>1</sub>/n</i>                                                       | <i>P-1</i>                                                                    | <i>Pnma</i>                                                                  | <i>P2<sub>1</sub>/c</i>                                                       |
| <i>a</i> (Å)                                                                                | 7.0674(4)                                                                     | 9.4556(14)                                                                    | 17.4877(15)                                                                  | 8.9078(7)                                                                     |
| <i>b</i> (Å)                                                                                | 19.8103(10)                                                                   | 9.4596(14)                                                                    | 6.6760(6)                                                                    | 24.2649(18)                                                                   |
| <i>c</i> (Å)                                                                                | 21.2365(12)                                                                   | 29.009(4)                                                                     | 13.8701(12)                                                                  | 8.1079(6)                                                                     |
| $\alpha$ (°)                                                                                | 90                                                                            | 87.486(3)                                                                     | 90                                                                           | 90                                                                            |
| $\beta$ (°)                                                                                 | 92.976                                                                        | 87.279(3)                                                                     | 90                                                                           | 91.485(2)                                                                     |
| $\gamma$ (°)                                                                                | 90                                                                            | 84.662(3)                                                                     | 90                                                                           | 90                                                                            |
| <i>V</i> (Å <sup>3</sup> )                                                                  | 2969.3(3)                                                                     | 2558.8(7)                                                                     | 1619.3(2)                                                                    | 1751.9(2)                                                                     |
| <i>Z</i>                                                                                    | 4                                                                             | 2                                                                             | 4                                                                            | 4                                                                             |
| <i>D<sub>c</sub></i> (g cm <sup>-3</sup> )                                                  | 2.402                                                                         | 2.642                                                                         | 3.050                                                                        | 2.926                                                                         |
| <i>F</i> (000)                                                                              | 1984                                                                          | 1856                                                                          | 1328                                                                         | 1392                                                                          |
| $\mu$ (mm <sup>-1</sup> )                                                                   | 5.495                                                                         | 6.369                                                                         | 8.117                                                                        | 7.508                                                                         |
| Reflections collected                                                                       | 43180                                                                         | 37987                                                                         | 20906                                                                        | 23273                                                                         |
| Unique reflections                                                                          | 7394                                                                          | 12463                                                                         | 2169                                                                         | 4289                                                                          |
| <i>R</i> <sub>int</sub>                                                                     | 0.0404                                                                        | 0.0340                                                                        | 0.0229                                                                       | 0.0340                                                                        |
| Goodness-of-fit on <i>F</i> <sup>2</sup>                                                    | 1.194                                                                         | 1.156                                                                         | 1.175                                                                        | 1.258                                                                         |
| <i>R</i> <sub>1</sub> / <i>wR</i> <sub>2</sub> , [ <i>I</i> ≥2σ( <i>I</i> )] <sup>a,b</sup> | 0.0433, 0.1273                                                                | 0.0442, 0.1350                                                                | 0.0426, 0.1278                                                               | 0.0405, 0.1139                                                                |
| <i>R</i> <sub>1</sub> / <i>wR</i> <sub>2</sub> , (all data)                                 | 0.0566, 0.1420                                                                | 0.0563, 0.1537                                                                | 0.0521, 0.1518                                                               | 0.0462, 0.1232                                                                |
| $\Delta\rho_{\max}$ , $\Delta\rho_{\min}$ (e Å <sup>-3</sup> )                              | 1.164, -1.966                                                                 | 1.916, -2.403                                                                 | 2.714, -2.561                                                                | 2.820, -2.595                                                                 |

$$^a R_1 = \sum ||F_o| - |F_c|| / \sum |F_o|$$

$$^b wR_2 = [\sum w(F_o^2 - F_c^2)^2 / \sum w(F_o^2)^2]^{1/2}$$

**Table S2** Selected bond lengths (Å) and angles (°) for **1-4**

| Compound 1                                                                      |           |                     |           |
|---------------------------------------------------------------------------------|-----------|---------------------|-----------|
| Ag(1)-I(2)                                                                      | 2.8201(8) | Ag(2)-I(3)#1        | 2.8478(8) |
| Ag(1)-I(3)                                                                      | 2.8482(8) | Ag(2)-I(4)#1        | 2.8839(9) |
| Ag(1)-I(4)                                                                      | 2.8770(8) | Ag(2)-I(1)          | 2.9176(8) |
| Ag(1)-I(1)                                                                      | 2.9175(8) | Ag(2)-I(2)          | 2.8271(9) |
| I(2)-Ag(1)-I(3)                                                                 | 110.19(3) | I(3)#1-Ag(2)-I(4)#1 | 106.45(3) |
| I(2)-Ag(1)-I(4)                                                                 | 118.13(3) | I(2)-Ag(2)-I(1)     | 100.89(3) |
| I(3)-Ag(1)-I(4)                                                                 | 106.63(3) | I(3)#1-Ag(2)-I(1)   | 111.43(3) |
| I(2)-Ag(1)-I(1)                                                                 | 101.06(3) | I(4)#1-Ag(2)-I(1)   | 108.28(2) |
| I(3)-Ag(1)-I(1)                                                                 | 111.78(3) | I(2)-Ag(2)-I(3)#1   | 111.14(3) |
| I(4)-Ag(1)-I(1)                                                                 | 109.08(2) | I(2)-Ag(2)-I(4)#1   | 118.58(3) |
| Symmetry code: #1 x-1,y,z; 2 x+1,y,z; #1 x,y,z-1; #2 -x+1,-y+1,-z+1; #3 x,y,z+1 |           |                     |           |
| Compound 2                                                                      |           |                     |           |
| Ag(1)-I(1)                                                                      | 2.8297(8) | Ag(1)-I(2)          | 2.8487(9) |
| Ag(1)-I(6)                                                                      | 2.8577(9) | Ag(1)-I(7)#1        | 2.9249(9) |
| Ag(2)-I(3)                                                                      | 2.8488(9) | Ag(2)-I(2)          | 2.8548(9) |
| Ag(2)-I(5)                                                                      | 2.8608(9) | Ag(2)-I(8)#2        | 2.8794(9) |
| Ag(3)-I(3)                                                                      | 2.8483(9) | Ag(3)-I(4)          | 2.8545(8) |
| Ag(3)-I(6)                                                                      | 2.8597(9) | Ag(3)-I(7)          | 2.8753(9) |
| Ag(4)-I(1)                                                                      | 2.8298(9) | Ag(4)-I(4)          | 2.8500(9) |
| Ag(4)-I(5)                                                                      | 2.8586(9) | Ag(4)-I(8)          | 2.9251(9) |
| I(1)-Ag(1)-I(2)                                                                 | 109.18(3) | I(1)-Ag(1)-I(6)     | 117.71(3) |
| I(2)-Ag(1)-I(6)                                                                 | 110.57(3) | I(1)-Ag(1)-I(7)#1   | 102.79(2) |
| I(2)-Ag(1)-I(7)#1                                                               | 107.21(3) | I(6)-Ag(1)-I(7)#1   | 108.66(3) |
| I(3)-Ag(2)-I(2)                                                                 | 108.97(3) | I(3)-Ag(2)-I(5)     | 108.75(3) |
| I(2)-Ag(2)-I(5)                                                                 | 105.51(2) | I(3)-Ag(2)-I(8)#2   | 105.41(3) |
| I(2)-Ag(2)-I(8)#2                                                               | 115.78(3) | I(5)-Ag(2)-I(8)#2   | 112.28(3) |
| I(3)-Ag(3)-I(4)                                                                 | 108.47(3) | I(3)-Ag(3)-I(6)     | 108.90(3) |
| I(4)-Ag(3)-I(6)                                                                 | 105.39(2) | I(3)-Ag(3)-I(7)     | 105.81(2) |
| I(4)-Ag(3)-I(7)                                                                 | 115.87(3) | I(6)-Ag(3)-I(7)     | 112.25(3) |
| I(1)-Ag(4)-I(4)                                                                 | 109.31(3) | I(1)-Ag(4)-I(5)     | 117.82(3) |

|                 |           |                 |           |
|-----------------|-----------|-----------------|-----------|
| I(4)-Ag(4)-I(5) | 110.44(3) | I(1)-Ag(4)-I(8) | 102.81(2) |
| I(4)-Ag(4)-I(8) | 107.12(3) | I(5)-Ag(4)-I(8) | 108.62(3) |

Symmetry code: #1 x+1,y,z; #2 x,y-1,z; #3 x-1,y,z; #4 x,y+1,z

---

**Compound 3**

---

|                   |            |                   |           |
|-------------------|------------|-------------------|-----------|
| Ag(1)-I(3)        | 2.7990(9)  | Ag(1)-I(2)        | 2.8011(9) |
| Ag(1)-I(1)#1      | 2.8979(8)  | Ag(1)-I(1)        | 2.9508(9) |
| Ag(1)-Ag(1)#2     | 3.1268(15) |                   |           |
| I(3)-Ag(1)-I(2)   | 114.86(3)  | I(3)-Ag(1)-I(1)#1 | 111.73(3) |
| I(2)-Ag(1)-I(1)#1 | 112.95(3)  | I(3)-Ag(1)-I(1)   | 103.68(3) |
| I(2)-Ag(1)-I(1)   | 104.93(3)  | I(1)#1-Ag(1)-I(1) | 107.74(2) |

Symmetry code: 1 -x+1,-y,-z+1; x,-y+1/2,z; -x+1,y-1/2,-z+1; x,-y-1/2,z

---

**Compound 4**

---

|                     |           |                   |            |
|---------------------|-----------|-------------------|------------|
| Ag(1)-I(1)          | 2.8544(8) | Ag(2)-I(3)        | 2.8155(8)  |
| Ag(1)-I(3)#1        | 2.8577(8) | Ag(2)-I(1)#2      | 2.9263(9)  |
| Ag(1)-I(2)          | 2.8620(8) | Ag(2)-I(1)        | 3.0727(9)  |
| Ag(1)-I(3)#2        | 2.9375(8) | Ag(2)-I(2)        | 2.7737(7)  |
| Ag(1)-Ag(2)#2       | 3.1846(8) | Ag(2)-Ag(1)#2     | 3.1846(8)  |
| Ag(1)-Ag(2)         | 3.0664(9) | Ag(2)-Ag(2)#2     | 2.8909(13) |
| I(1)-Ag(1)-I(3)#1   | 109.61(3) | I(2)-Ag(2)-I(1)   | 102.28(2)  |
| I(1)-Ag(1)-I(2)     | 105.71(3) | I(3)-Ag(2)-I(1)   | 95.62(3)   |
| I(3)#1-Ag(1)-I(2)   | 104.01(2) | I(1)#2-Ag(2)-I(1) | 122.44(2)  |
| I(1)-Ag(1)-I(3)#2   | 102.13(2) | I(2)-Ag(2)-I(3)   | 131.36(3)  |
| I(3)#1-Ag(1)-I(3)#2 | 108.58(2) | I(2)-Ag(2)-I(1)#2 | 104.12(3)  |
| I(2)-Ag(1)-I(3)#2   | 126.19(3) | I(3)-Ag(2)-I(1)#2 | 103.37(2)  |

Symmetry code: #1 x,y,z-1; #2 -x+1,-y+1,-z+1; #3 x,y,z+1

---

**Table S3.** Hydrogen bonds of for compounds **1-4** (Å and °).

| Compound 1                                                                             |        |          |          |        |
|----------------------------------------------------------------------------------------|--------|----------|----------|--------|
| D-H...A                                                                                | d(D-H) | d(H...A) | d(D...A) | <(DHA) |
| C(1)-H(1)...I(3)#1                                                                     | 0.930  | 3.094    | 3.946    | 153.17 |
| C(2)-H(2C)...I(4)#1                                                                    | 0.960  | 3.231    | 4.147    | 160.20 |
| C(4)-H(4)...I(2)#2                                                                     | 0.930  | 3.067    | 3.992    | 173.26 |
| C(10)-H(10A)...I(3)#1                                                                  | 0.960  | 3.209    | 4.123    | 159.83 |
| C(10)-H(10B)...I(3)#3                                                                  | 0.960  | 3.252    | 4.185    | 164.53 |
| C(12)-H(12)...I(1)#2                                                                   | 0.930  | 2.877    | 3.760    | 159.01 |
| C(13)-H(13A)...I(1)#2                                                                  | 0.960  | 3.271    | 4.146    | 152.32 |
| C(15)-H(15)...I(3)#1                                                                   | 0.930  | 3.078    | 4.000    | 171.57 |
| C(20)-H(20)...I(4)#4                                                                   | 0.930  | 3.288    | 4.202    | 168.19 |
| #1 x-1, y, z-1; #2 x-1/2, -y+1/2, z-1/2; #3 -x+2, -y+1, -z+1; #4 -x+3/2, y+1/2, -z+3/2 |        |          |          |        |
| Compound 2                                                                             |        |          |          |        |
| D-H...A                                                                                | d(D-H) | d(H...A) | d(D...A) | <(DHA) |
| C(1)-H(1)...I(1)#1                                                                     | 0.930  | 3.083    | 3.771    | 132.17 |
| C(1)-H(1)...I(2)#2                                                                     | 0.930  | 3.110    | 3.724    | 125.15 |
| C(10)-H(10)...I(3)                                                                     | 0.930  | 3.106    | 3.703    | 123.62 |
| C(10)-H(10)...I(4)#3                                                                   | 0.930  | 3.004    | 3.684    | 131.20 |
| C(19)-H(19)...I(1)#3                                                                   | 0.930  | 3.064    | 3.758    | 132.79 |
| C(19)-H(19)...I(4)#4                                                                   | 0.930  | 3.126    | 3.736    | 124.76 |
| C(28)-H(28)...I(2)                                                                     | 0.930  | 2.991    | 3.682    | 132.38 |
| C(28)-H(28)...I(3)#5                                                                   | 0.930  | 3.127    | 3.720    | 123.34 |
| N(1)-H(1A)...I(7)#3                                                                    | 0.860  | 2.845    | 3.643    | 155.11 |
| N(2)-H(2A)...I(2)#2                                                                    | 0.860  | 3.292    | 3.796    | 119.96 |
| N(2)-H(2A)...I(3)                                                                      | 0.860  | 3.231    | 3.691    | 116.09 |
| N(2)-H(2A)...I(7)                                                                      | 0.860  | 3.212    | 3.865    | 134.69 |
| N(3)-H(3)...I(6)#3                                                                     | 0.860  | 2.894    | 3.678    | 152.47 |
| N(4)-H(4)...I(2)                                                                       | 0.860  | 3.141    | 3.599    | 115.68 |
| N(4)-H(4)...I(3)                                                                       | 0.860  | 3.245    | 3.753    | 120.33 |
| N(4)-H(4)...I(6)                                                                       | 0.860  | 3.253    | 3.889    | 132.81 |
| N(5)-H(5A)...I(8)#3                                                                    | 0.860  | 2.847    | 3.643    | 154.57 |
| N(6)-H(6)...I(3)#5                                                                     | 0.860  | 3.225    | 3.686    | 116.17 |
| N(6)-H(6)...I(4)#4                                                                     | 0.860  | 3.289    | 3.793    | 120.06 |

|                    |       |       |       |        |
|--------------------|-------|-------|-------|--------|
| N(6)-H(6)···I(8)#4 | 0.860 | 3.216 | 3.866 | 134.33 |
| N(7)-H(7)···I5     | 0.860 | 3.216 | 3.676 | 152.37 |
| N(8)-H(8)···I(3)#5 | 0.860 | 3.249 | 3.757 | 120.38 |
| N(8)-H(8)···I(4)#5 | 0.860 | 3.127 | 3.593 | 116.39 |
| N(8)-H(8)···I(5)#5 | 0.860 | 3.261 | 3.893 | 132.39 |

#1 x-1, y, z-1; #2 x-1/2, -y+1/2, z-1/2; #3 -x+2, -y+1, -z+1; #4 -x+3/2, y+1/2, -z+3/2

---

**Compound 3**

---

| D-H···A             | d(D-H) | d(H···A) | d(D···A) | <(DHA) |
|---------------------|--------|----------|----------|--------|
| C(2)-H(2)···I(1)#1  | 0.930  | 3.190    | 3.839    | 128.53 |
| C(5)-H(5)···I(3)#2  | 0.930  | 3.008    | 3.899    | 160.95 |
| C(8)-H(8)···I(3)#3  | 0.930  | 3.202    | 4.043    | 151.40 |
| C(9)-H(9A)···I(1)#3 | 0.960  | 3.175    | 4.088    | 159.36 |
| C(9)-H(9B)···I(3)   | 0.960  | 3.311    | 4.236    | 162.32 |

#1 -x+1, -y+1, -z+1; #2 -x+1, -y+1, -z+2; #3 -x+3/2, -y+1, z+1/2

---

**Compound 4**

---

| D-H···A             | d(D-H) | d(H···A) | d(D···A) | <(DHA) |
|---------------------|--------|----------|----------|--------|
| C(1)-H(1C)···I(3)#1 | 0.960  | 2.998    | 3.915    | 160.18 |
| C(1)-H(1A)···I(3)#2 | 0.960  | 3.215    | 4.079    | 150.54 |
| C(2)-H(2)···I(1)#3  | 0.930  | 3.297    | 3.909    | 125.33 |
| C(3)-H(3A)···I(3)#3 | 0.960  | 3.178    | 4.101    | 161.72 |
| C(6)-H(6)···I(2)    | 0.930  | 3.192    | 4.111    | 170.03 |

#1 x-1, y, z-1; #2 -x+1, -y+1, -z+1; #3 -x+1, -y+1, -z; #4 x, y, z-1; #5 x, -y+1/2, z-1/2

---



**Table S4.** Synthesis conditions for compounds **1-4**.

| Entry | DMBI/BI<br>(mmol) | AgI<br>(mmol) | NaI·2H <sub>2</sub> O<br>(mmol) | HI<br>(mL) | Methanol<br>(mL) | Acetonitrile<br>(mL) | Product  |
|-------|-------------------|---------------|---------------------------------|------------|------------------|----------------------|----------|
| 1     | 0.6               | 0.6           | 2                               | 0.2        | 2                | 3                    | <b>1</b> |
| 2     | 0.6               | 0.6           | 2                               | 0.2        | 5                | 0                    | <b>2</b> |
| 3     | 0.6               | 1.2           | 2                               | 0.2        | 2                | 3                    | <b>3</b> |
| 4     | 0.6               | 1.2           | 2                               | 0.2        | 2                | 3                    | <b>4</b> |
